# Supplementary material
Source: ML conference proceedings conference paper supplement (https://openaccess.thecvf.com/content/ICCV2025/html/Liang_Spatial_Alignment_and_ICCV_2025_paper.html)
Supplement: Supplementary file 1 [file Liang_Spatial_Alignment_and_ICCV_2025_supplemental.pdf]

# Spatial Alignment and Temporal Matching Adapter for Video-Radar Remote Physiological Measurement

## Supplementary Material

| Parameters        | Value          |
|-------------------|----------------|
| Start frequency   | 77GHz          |
| Frequency slope   | 65MHz/ $\mu$ s |
| Idle time         | 10 $\mu$ s     |
| Ramp end time     | 60 $\mu$ s     |
| Sample points     | 256            |
| Sample rate       | 5MHz           |
| Frame periodicity | 1.67ms         |

Table 8. Radar Parameters Settings.

## 6. Details of MMRPM Dataset

RGB videos are recorded with a Logitech C930c camera at a frame rate of 30 fps. Radar data is collected using a Texas Instruments AWR1843BOOST development board at a distance of approximately 0.5 meters. We activate 3 transmitters and 4 receivers of the radar to achieve a virtual 2D antenna array with 12 channels. The detailed configuration of the radar chirp and frame parameters is provided in Tab. 8. Ground-truth PPG signals are acquired using a CONTEC CMS50E sensor at a sampling rate of 60 Hz. During pre-processing, the radar data and PPG signals are downsampled to 120 Hz and 30 Hz respectively.

Examples of the dataset are shown in Fig. 4.

## 7. Details of Unimodal Pre-training

### 7.1. Video Pre-training

We utilize the following datasets to pre-train our video UniFormer:

**VIPL** [31, 32]. This dataset contains 2,378 RGB videos captured by 4 cameras in different scenarios, including various head movements and illumination conditions.

**MMPD** [40]. It comprises 660 mobile phone videos of subjects with different skin tokens. Similarly to VIPL, it also covers a wide range of lighting conditions and subject activities.

**UBFC** [1]. This dataset includes 42 uncompressed videos recorded at varying levels of sunlight and indoor illumination.

**PURE** [39]. It consists of 60 videos of 10 subjects under six different activities, namely steady, talking, slow translation, fast translation, slow rotation, and medium rotation.

**BUAA** [47]. It records 165 videos under varying illumination levels ranging from 1.0 to 100.0 lux. Since video modality struggles to tackle low-light condition alone, we

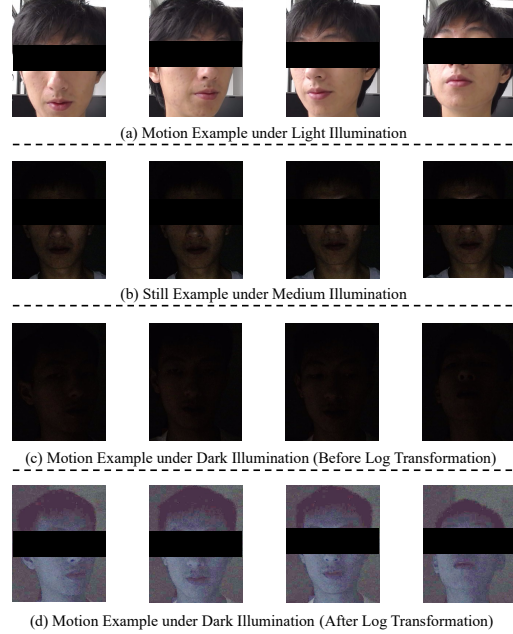

Figure 4. Examples of the self-collected MMRPM dataset.

only use videos with illumination greater than or equal to 6.3 lux for video pre-training.

We train the model on these datasets jointly with a batch size of 8 and utilize the Adam [54] optimizer with a learning rate of  $1e-4$ . Random horizontal flipping, spatially resized crop, random intensity noise, and temporal resample introduced in [33, 50] are used for data augmentation.

### 7.2. Radar Pre-training

We utilize the dataset introduced in [53] to pre-train our radar UniFormer. This dataset records radar data and synchronized ECG signals from 6,222 subjects. Due to the significant waveform differences between ECG and PPG signals, we transform the ECG signals into Gaussian heartbeat signals following [43] as ground truths during pre-training. The batch size and learning rate are set to 8 and  $1e-3$  respectively.

## 8. Additional Results

### 8.1. Comparison with Unimodal Methods

As shown in Tab. 9, we also compare our method with existing unimodal remote physiological measurement methods on our MMRPM dataset. Notably, our radar Uni-

| Methods            | Modality    | Std↓         | MAE↓         | RMSE↓        | R↑           | Trainable<br>Params (M)↓ |
|--------------------|-------------|--------------|--------------|--------------|--------------|--------------------------|
| PhysNet[49]        | Video       | 10.981       | 4.813        | 11.280       | 0.501        | 0.77                     |
| PhysFormer[51]     | Video       | 8.400        | 2.841        | 8.473        | 0.667        | 7.38                     |
| RCG2ECGNet[3]      | Radar       | 6.481        | 2.879        | 6.555        | 0.761        | 3.61                     |
| HRVNet[43]         | Radar       | 6.333        | 2.363        | 6.386        | 0.782        | 0.86                     |
| UniFormer[18]      | Video       | 5.726        | 1.733        | 5.726        | 0.818        | 22.64                    |
| UniFormer          | Radar       | 5.824        | 1.891        | 5.845        | 0.813        | 22.23                    |
| <b>SATM (Ours)</b> | Video-Radar | <b>5.063</b> | <b>1.292</b> | <b>5.074</b> | <b>0.858</b> | 10.78                    |

Table 9. Additional results of existing unimodal methods on the MMRPM dataset.

| Methods            | Std↓         | MAE↓         | RMSE↓        | R↑           |
|--------------------|--------------|--------------|--------------|--------------|
| EquiPleth*         | 8.787        | 4.256        | 9.082        | 0.629        |
| Fusion-Vital*      | 8.538        | 4.457        | 8.897        | 0.642        |
| CardiacMamba*      | 9.048        | 5.038        | 9.308        | 0.603        |
| UniAdapter         | 8.503        | 3.930        | 8.748        | 0.656        |
| MMA                | 8.614        | 4.250        | 8.821        | 0.640        |
| BAT                | 8.455        | 3.994        | 8.590        | 0.647        |
| LAVISH             | 8.026        | 3.687        | 8.232        | 0.712        |
| <b>SATM (Ours)</b> | <b>7.542</b> | <b>3.423</b> | <b>7.656</b> | <b>0.738</b> |

Table 10. Detailed results of the cross-dataset evaluation from the EquiPleth dataset to the MMRPM dataset.

Former achieves significant improvements over existing radar-based methods, which can be attributed to its superior spatio-temporal modeling capability. In contrast, existing methods are primarily designed for constrained scenarios and are highly susceptible to subject motions appearing in the MMRPM dataset. Moreover, unimodal UniFormers demonstrate subpar performance due to their sensitivity to light conditions or head motions, while our SATM extracts complementary features for both backbones and showcases superior performance on this challenging dataset.

## 8.2. Details of Cross-dataset Evaluation

The main differences in radar setup between EquiPleth and MMRPM lie in the number of antennas and the resulting virtual channels. Therefore, for the evaluation from EquiPleth to MMRPM, we only used the MMRPM radar data collected from a pair of antennas for alignment.

Detailed results from EquiPleth to MMRPM are provided in Tab. 10. We also performed the reverse evaluation from MMRPM to EquiPleth, where the virtual channel of the EquiPleth radar data are duplicated to match the number of MMRPM. As shown in Tab. 11, our method consistently outperforms the best baseline, LAVISH.

| Methods            | Std↓         | MAE↓         | RMSE↓        | R↑           |
|--------------------|--------------|--------------|--------------|--------------|
| EquiPleth*         | 2.713        | 0.722        | 2.725        | 0.973        |
| Fusion-Vital*      | 1.939        | 0.698        | 1.944        | 0.986        |
| CardiacMamba*      | 3.223        | 0.929        | 3.240        | 0.962        |
| UniAdapter         | 1.653        | 0.656        | 1.657        | 0.990        |
| MMA                | 1.843        | 0.721        | 1.843        | 0.987        |
| BAT                | 2.097        | 0.696        | 2.100        | 0.984        |
| LAVISH             | 1.630        | 0.641        | 1.632        | 0.990        |
| <b>SATM (Ours)</b> | <b>1.330</b> | <b>0.578</b> | <b>1.331</b> | <b>0.994</b> |

Table 11. Detailed results of the cross-dataset evaluation from the MMRPM dataset to the EquiPleth dataset.

| Methods            | Motion       | Dark         | Dark&Motion  |
|--------------------|--------------|--------------|--------------|
| Vision UniFormer   | 2.087        | 3.046        | 3.290        |
| Radar UniFormer    | 2.595        | 2.181        | 2.608        |
| EquiPleth*         | 1.954        | 2.111        | 2.848        |
| Fusion-Vital*      | 1.786        | 2.453        | 2.527        |
| CardiacMamba*      | 2.334        | 2.380        | 2.475        |
| UniAdapter         | 1.903        | 2.069        | 2.431        |
| MMA                | 1.965        | 2.107        | 2.521        |
| BAT                | 2.377        | 2.369        | 2.544        |
| LAVISH             | 1.762        | 2.029        | 2.362        |
| <b>SATM (Ours)</b> | <b>1.647</b> | <b>1.812</b> | <b>1.923</b> |

Table 12. MAE results of challenging scenarios in MMRPM.

## 8.3. Extra results on MMRPM

Tab. 12 shows MAE results on challenging scenarios in MMRPM. It is evident that SATM demonstrates superior performance in both low-light and head-motion conditions.
